# Supplementary material for: Disentangling the Tissue-Specific Variations of Volatile Flavor Profiles of <em>Lentinula edodes</em> Fruiting Body
Source: Preprints.org preprint supplement (doi:10.20944/preprints202311.0059.v1), 2023-11-01
Supplement: Supplementary file 1 [file supplementary]

Table S1. Annotations of all the detected compounds from different tissues of the strain T2 and 0912 fruiting body. RT, Retention time; RI, Kovats retention index.

| Number | Compounds | CAS Registry  Number | RT | RI | Chemical  Class |
| --- | --- | --- | --- | --- | --- |
| 1 | Dimethyl, disulfide | 624-92-0 | 3.339 | 740 | Sulfur compounds |
| 2 | 1-Octene | 111-66-0 | 3.915 | 792 | Alkenes |
| 3 | 3-Cyclohepten-1-one | 1121-64-8 | 4.461 | 820 | Ketones |
| 4 | p-Xylene | 106-42-3 | 5.14 | 875 | Benzenoids |
| 5 | Oxime-methoxy-phenyl- | 67160-14-9 | 6.065 | 896 | Benzenoids |
| 6 | α-Pinene | 7785-70-8 | 6.19 | 928 | Terpenes |
| 7 | Benzaldehyde | 100-52-7 | 6.654 | 960 | Benzenoids |
| 8 | Diemethyl trisulfide | 3658-80-8 | 6.818 | 975 | Sulfur compounds |
| 9 | 1-Octen-3-one | 4312-99-6 | 6.939 | 979 | Ketones |
| 10 | 1-Octen-3-ol | 3391-86-4 | 7.089 | 982 | Alcohols |
| 11 | 3-Octanone | 106-68-3 | 7.194 | 990 | Ketones |
| 12 | p-Cymene | 99-87-6 | 7.709 | 1025 | Terpenes |
| 13 | D-Limonene | 5989-27-5 | 7.77 | 1032 | Terpenes |
| 14 | Decane,3,6-diemthyl- | 17312-53-7 | 8.17 | 1130 | Alkanes |
| 15 | 2-Octenal | 2363-89-5 | 8.196 | 1060 | Aldehydes |
| 16 | (Z)-2-Octenol | 26001-58-1 | 8.37 | 1071 | Alcohols |
| 17 | Octyl choloformate | 7452-59-7 | 8.412 | 1250 | Esters |
| 18 | α,p-Dimethylstyrene | 1195-32-0 | 8.622 | 1120 | Benzenoids |
| 19 | Benzene, (2-methyl-1-propenyl)- | 768-49-0 | 8.734 | 1218 | Terpenes |
| 20 | 1,2,4-Trithiolane | 289-16-7 | 8.852 | 1110 | Sulfur compounds |
| 21 | Phenylethyl alcohol | 60-12-8 | 9.115 | 1126 | Alcohols |
| 22 | 2,4,5-Trithiahexane | 42474-44-2 | 9.344 | 1145 | Sulfur compounds |
| 23 | 2-Phenylpropenal | 4432-63-7 | 9.786 | 1161 | Benzenoids |
| 24 | Dodecane | 112-40-3 | 10.35 | 1221 | Alkanes |
| 25 | Undecane,2,4-dimethyl | 17312-80-0 | 10.51 | 1223 | Alkanes |
| 26 | Undecane,2,6-dimethyl | 17301-23-4 | 10.55 | 1216 | Alkanes |
| 27 | Tetrasulfide dimethyl | 5756-24-1 | 10.75 | 1215 | Sulfur compounds |
| 28 | 1,3-Di-tert-butylbenzene | 1014-60-4 | 11.21 | 1240 | Benzenoids |
| 29 | Decane,1-iodo- | 2050-77-3 | 11.28 | 1400 | Alkanes |
| 30 | 2-Bromo dodecane | 13187-99-0 | 11.44 | 1540 | Alkanes |
| 31 | Heptadecane,8-methyl- | 13287-23-5 | 11.52 | 1290 | Alkanes |
| 32 | Tridecane | 629-50-5 | 11.79 | 1310 | Alkanes |
| 33 | 1,2,4,5-Tetrathiane | 291-22-5 | 12.67 | 1332 | Sulfur compounds |
| 34 | 2,3,5,6-Tetrathiaheptane |  | 12.72 | 1344 | Sulfur compounds |
| 35 | Tetradecane | 629-59-4 | 13.18 | 1370 | Alkanes |
| 36 | Lenthionine | 292-46-6 | 16.45 | 1622 | Sulfur compounds |
